# Supplementary material for: The dielectric properties and charge transport mechanism of π-conjugated segments decorated with intrinsic conducting polymer
Source: Royal Society of Chemistry journal article supplement (doi:10.1039/c6ra09554b), 2016-01-01
Supplement: c6ra09554b1.pdf [file c6ra09554b1.pdf]

## Dielectric properties and charge transport mechanism of $\pi$ -conjugated segments decorated with intrinsic conducting polymer

Jitendra Tahalyani<sup>a</sup>, Khushbu K. Rahangdale<sup>a</sup>, Balasubramanian K<sup>\*a</sup>

<sup>a</sup>Department of Materials Engineering, Defence Institute of Advanced Technology, Girinagar, 411021, India.

<sup>a\*</sup>E-mail: [meetkbs@gmail.com](mailto:meetkbs@gmail.com); Fax: +91 020 2438-9509; Tel: +91 020 2438-9680

### Supporting Information

The accelerating nature of the frequency dependent conductivity approximately follows universal power law, represented by equation [1]:

$$\sigma'_{ac}(\omega) = A(T)\omega^S$$

Where A(T) is dispersion parameter,  $\omega$  is frequency and S ( $0 \leq S \leq 1$ ) is dimensionless exponent of frequency. Values of A and S are calculated using power law least square fitting equation all measured temperature are tabulated in table 2 and table 3 for PVA/PVP and PVA/PVP/PANI(20weight%). The variation in the value of S with respect to temperature is further used to verify conduction mechanism in PVA/PVP and PVA/PVP/PANI.

Ac conductivity at (10MHz), low frequency conductivity (DC conductivity) (0.1Hz) and dielectric at 1KHz as well as at 10MHz is shown in table 2 and table 3 for both PVA/PVP and PVA/PVP/PANI (20weight%) respectively for various range of temperature (0°C to 100°C).

**Table 1. Dielectric constant and ac conductivity at different frequency and fitting parameter A and frequency exponent S (equation 4) at various temperatures for PVA/PVP films.**

| PVA/PVP    |                               |                               |                        |      |                     |                      |
|------------|-------------------------------|-------------------------------|------------------------|------|---------------------|----------------------|
| Temp. (°C) | $\sigma_{DC}$ (s/cm) at 0.1Hz | $\sigma_{ac}$ (s/cm) at 10MHz | A                      | S    | $\epsilon'$ at 1KHz | $\epsilon'$ at 10MHz |
| 0          | $1.39 \times 10^{-13}$        | $1.67 \times 10^{-6}$         | $8.35 \times 10^{-14}$ | 0.95 | 6.45                | 5.07                 |
| 10         | $1.84 \times 10^{-13}$        | $1.94 \times 10^{-6}$         | $1.72 \times 10^{-13}$ | 0.92 | 6.86                | 5.42                 |
| 20         | $3.71 \times 10^{-13}$        | $2.35 \times 10^{-6}$         | $5.00 \times 10^{-12}$ | 0.72 | 7.31                | 5.47                 |
| 30         | $8.21 \times 10^{-12}$        | $2.86 \times 10^{-6}$         | $3.99 \times 10^{-10}$ | 0.25 | 7.80                | 5.74                 |
| 40         | $3.05 \times 10^{-12}$        | $3.53 \times 10^{-6}$         | $2.34 \times 10^{-9}$  | 0.19 | 8.51                | 6.11                 |

|     |                        |                        |                         |      |      |      |
|-----|------------------------|------------------------|-------------------------|------|------|------|
| 50  | 2.41x10 <sup>-11</sup> | 4.51 x10 <sup>-6</sup> | 1.33 x10 <sup>-8</sup>  | 0.06 | 9.79 | 6.63 |
| 60  | 2.85x10 <sup>-10</sup> | 6.01 x10 <sup>-6</sup> | 1.37 x10 <sup>-8</sup>  | 0.24 | 12.3 | 7.36 |
| 70  | 1.71x10 <sup>-9</sup>  | 7.90 x10 <sup>-6</sup> | 6.66 x10 <sup>-9</sup>  | 0.50 | 16.2 | 8.29 |
| 80  | 6.75x10 <sup>-9</sup>  | 9.99 x10 <sup>-6</sup> | 3.20 x10 <sup>-9</sup>  | 0.74 | 21.9 | 9.36 |
| 90  | 2.18x10 <sup>-8</sup>  | 1.19 x10 <sup>-5</sup> | 1.54 x10 <sup>-9</sup>  | 0.91 | 28.3 | 10.5 |
| 100 | 5.32x10 <sup>-8</sup>  | 1.36 x10 <sup>-5</sup> | 7.74 x10 <sup>-10</sup> | 0.97 | 31.1 | 11.7 |

**Table 2. Dielectric constant and ac conductivity at different frequency and fitting parameter A and frequency exponent S (equation 4) at various temperatures for PVA/PVP/PANI (20wt%).**

| PVA/PVP/PANI (20 weight%) |                               |                               |                        |       |                       |                      |
|---------------------------|-------------------------------|-------------------------------|------------------------|-------|-----------------------|----------------------|
| Temp. (°C)                | $\sigma_{DC}$ (s/cm) at 0.1Hz | $\sigma_{ac}$ (s/cm) at 10MHz | A                      | S     | $\epsilon'$ at 1KHz   | $\epsilon'$ at 10MHz |
| 0                         | 4.05x10 <sup>-7</sup>         | 2.36 x10 <sup>-5</sup>        | 3.64x10 <sup>-6</sup>  | 0.19  | 52.3                  | 2.2                  |
| 10                        | 5.21 x10 <sup>-7</sup>        | 1.98 x10 <sup>-5</sup>        | 2.39 x10 <sup>-7</sup> | 0.18  | 64.9                  | 2.97                 |
| 20                        | 8.76 x10 <sup>-7</sup>        | 2.19 x10 <sup>-5</sup>        | 4.65 x10 <sup>-7</sup> | 0.16  | 87.8                  | 3.03                 |
| 30                        | 1.62 x10 <sup>-6</sup>        | 5.19 x10 <sup>-5</sup>        | 9.77 x10 <sup>-7</sup> | 0.14  | 1.31x10 <sup>2</sup>  | 11.9                 |
| 40                        | 2.98 x10 <sup>-6</sup>        | 6.64 x10 <sup>-5</sup>        | 2.08 x10 <sup>-6</sup> | 0.11  | 2.2 x10 <sup>2</sup>  | 14.2                 |
| 50                        | 5.03 x10 <sup>-6</sup>        | 7.88 x10 <sup>-5</sup>        | 3.95 x10 <sup>-6</sup> | 0.096 | 6 x10 <sup>2</sup>    | 15.9                 |
| 60                        | 7.56 x10 <sup>-6</sup>        | 9.15 x10 <sup>-5</sup>        | 6.43 x10 <sup>-6</sup> | 0.084 | 6.5 x10 <sup>2</sup>  | 16.5                 |
| 70                        | 1.03 x10 <sup>-5</sup>        | 1.04 x10 <sup>-4</sup>        | 9.26 x10 <sup>-6</sup> | 0.077 | 1.07 x10 <sup>3</sup> | 17.2                 |
| 80                        | 1.27 x10 <sup>-5</sup>        | 1.13 x10 <sup>-4</sup>        | 1.18 x10 <sup>-5</sup> | 0.073 | 1.57x10 <sup>3</sup>  | 20.6                 |
| 90                        | 1.43 x10 <sup>-5</sup>        | 1.14 x10 <sup>-4</sup>        | 1.39 x10 <sup>-5</sup> | 0.069 | 1.98 x10 <sup>3</sup> | 21.8                 |
| 100                       | 1.48 x10 <sup>-5</sup>        | 1.17 x10 <sup>-4</sup>        | 1.43 x10 <sup>-5</sup> | 0.068 | 2.09x10 <sup>3</sup>  | 22.8                 |

Using CBH mechanism model, hopping distance ( $R_H$ ) and maximum barrier width ( $W_m$ ) is calculated for different concentration using equation [2]:

$$R_H = \frac{e^2}{\pi\epsilon\epsilon_0} \left( \frac{1}{W_m + k_B T \ln(\omega\tau_1)} \right)$$

$$S = 1 - \frac{6k_B T}{W_m}$$

Where  $\epsilon$  is dielectric constant,  $\epsilon_0$  is permittivity of free space,  $W_m$  are maximum barrier height,  $K_B$  boltzmann constant and T is temperature. The calculated value of  $R_H$  and  $W_M$  is tabulate in table 4 along with the roughness value obtained for FSPC having different concentration of PANI.

**Table 3:**  $W_M$ ,  $R_H$  and Roughness of FSPC film for different weight% of PANI.

| Weight%  | $W_M$ (ev) | $R_H$ (A°) | Roughness ( $\mu\text{m}$ ) |
|----------|------------|------------|-----------------------------|
| 5% PANI  | 0.210      | 16.10      | 1.20                        |
| 10% PANI | 0.192      | 9.89       | 1.48                        |
| 15% PANI | 0.187      | 8.48       | 1.90                        |
| 20% PANI | 0.169      | 2.35       | 2.60                        |

### Reference

1. W. Cao, R. Gerhardt, Solid State Ionics, 1992, **42**, 213-221.
2. Gmati F, Fattoum A, Bohli N. and Mohamed AB, J. Phys. Condens. Matter., 2008, **20**, 125221-125230.
